# Supplementary material for: Developing and Validating a Risk Score for Lower-Extremity Amputation in Patients Hospitalized for a Diabetic Foot Infection
Source: PubMed Central journal article supplement — Diabetes Care. 2011 Jul 16;34(8):1695–700. doi: 10.2337/dc11-0331 (PMC3142050; doi:10.2337/dc11-0331), 2011-07-16
Supplement: supp_dc11-0331v110331_DC110331SupplementaryData.pdf [file supp_dc11-0331v110331_DC110331SupplementaryData.pdf]

SUPPLEMENTARY DATA

**Supplementary Table. Pathogen distribution and associated amputation rate**

| Pathogens                                     | Derivation Cohort    |                      | Validation Cohort    |                      |
|-----------------------------------------------|----------------------|----------------------|----------------------|----------------------|
|                                               | Prevalence,<br>n (%) | Amputation,<br>n (%) | Prevalence,<br>n (%) | Amputation,<br>n (%) |
| <b>Monomicrobial</b>                          |                      |                      |                      |                      |
| Methicillin-sensitive <i>S. aureus</i>        | 310<br>(13.9)        | 53 (17.1)            | 116<br>(14.7)        | 13 (11.2)            |
| Methicillin-resistant <i>S. aureus</i>        | 179 (8.0)            | 31 (17.3)            | 64 (8.1)             | 15 (23.4)            |
| Coagulase negative staphylococci              | 127 (5.7)            | 6 (4.7)              | 43 (5.5)             | 10 (23.3)            |
| <i>Streptococcus</i> spp                      | 137 (6.1)            | 30 (21.9)            | 57 (7.2)             | 13 (22.8)            |
| <i>Enterococcus</i> spp                       | 50 (2.2)             | 14 (28.0)            | 14 (1.8)             | 7 (50.0)             |
| Other gram positives                          | 10 (0.4)             | 0 (0.0)              | 2 (0.3)              | 0 (0.0)              |
| Enterobacter                                  | 10 (0.4)             | 2 (20.0)             | 3 (0.4)              | 1 (33.3)             |
| <i>Pseudomonas aeruginosa</i>                 | 38 (1.7)             | 3 (7.9)              | 8 (1.0)              | 1 (12.5)             |
| Other gram negatives                          | 63 (2.8)             | 19 (30.2)            | 30 (3.8)             | 10 (33.3)            |
| Anaerobic bacteria                            | 13 (0.6)             | 3 (23.1)             | 3 (0.4)              | 0 (0.0)              |
| Fungi                                         | 12 (0.5)             | 0 (0.0)              | 4 (0.5)              | 1 (25.0)             |
| <b>Polymicrobial</b>                          |                      |                      |                      |                      |
| Including MRSA                                | 193 (8.7)            | 48 (24.9)            | 71 (9.0)             | 12 (16.9)            |
| Including <i>Pseudomonas</i> but without MRSA | 195 (8.7)            | 46 (23.6)            | 71 (9.0)             | 22 (31.0)            |
| Without MRSA or <i>Pseudomonas</i>            | 893<br>(40.0)        | 208 (23.3)           | 302<br>(38.3)        | 79 (26.2)            |
| Sum of all type of polymicrobial              | 1,281<br>(57.4)      | 302 (23.6)           | 444 (56.3)           | 113 (25.5)           |

Note: Data are presented as n (%).
